# Supplementary material for: Proposal of a remote education model with the integration of an ICT architecture to improve learning management
Source: PeerJ Comput Sci. 2021 Dec 3;7:e781. doi: 10.7717/peerj-cs.781 (PMC8670391; doi:10.7717/peerj-cs.781)
Supplement: Supplemental Information 1 [file peerj-cs-07-781-s001.xlsx]

## Sheet: BDD
a	b	c	d	e	f	g	h	I	j	K	l	m	n	o
1	1	3	5	3	0	3	3	2	1	5	1	False	E	1
2	2	4	4	4	3	2	2	1	0	3	4	False	C	3
3	3	4	1	5	0	3	0	5	2	1	8	True	A	5
4	3	1	5	3	3	4	0	0	5	1	0	False	E	1
5	2	1	4	4	5	2	4	1	1	2	7	True	B	4
6	2	1	4	2	1	5	5	1	5	4	6	True	B	4
7	3	5	4	0	2	3	4	4	1	5	8	True	A	5
8	2	4	0	5	5	4	5	0	1	4	5	False	C	3
9	3	0	4	2	1	1	2	5	2	1	2	False	D	2
10	1	4	1	3	2	5	1	4	3	0	2	False	D	2
11	1	0	4	3	0	0	3	0	3	1	0	False	E	1
12	1	4	5	0	3	3	1	3	5	2	1	False	E	1
13	2	0	2	2	1	0	5	1	1	1	0	False	E	1
14	3	3	1	4	5	0	0	1	5	5	6	True	B	4
15	3	3	4	2	2	3	3	5	2	4	10	True	A	5
16	2	3	2	5	1	1	2	0	4	0	0	False	E	1
17	1	4	4	3	4	4	3	2	3	2	5	False	C	3
18	3	5	5	3	5	2	1	3	5	2	8	True	A	5
19	2	5	1	4	0	0	5	2	1	3	9	True	A	5
20	1	3	2	2	5	4	1	2	3	4	9	True	A	5
21	2	0	2	2	5	4	5	1	1	3	4	False	C	3
22	3	2	2	3	4	3	5	1	2	2	4	False	C	3
23	2	2	4	1	5	4	2	3	3	4	8	True	A	5
24	1	1	2	5	5	1	4	3	1	2	1	False	E	1
25	1	1	1	5	4	1	5	4	5	5	3	False	D	2
26	1	1	3	3	4	4	3	2	5	1	1	False	E	1
27	2	4	1	4	3	2	3	3	2	1	4	False	C	3
28	2	5	3	1	2	2	2	3	2	1	1	False	E	1
29	3	1	2	2	4	1	1	3	4	4	6	True	B	4
30	3	2	3	1	1	5	2	1	3	4	5	False	C	3
31	3	4	4	4	5	5	1	4	1	5	6	True	B	4
32	1	1	2	3	3	5	2	5	3	1	2	False	D	2
33	3	5	5	4	3	3	5	5	2	2	9	True	A	5
34	1	1	4	2	5	4	5	2	4	4	3	False	D	2
35	1	2	2	5	1	3	5	2	3	3	4	False	C	3
36	2	2	5	5	1	3	2	5	2	2	7	True	B	4
37	3	4	5	3	3	1	2	1	5	3	7	True	B	4
38	3	5	1	4	5	3	1	5	4	2	8	True	A	5
39	3	5	1	1	3	4	5	5	3	5	8	True	A	5
40	3	5	5	4	3	3	1	4	2	2	3	False	D	2
41	2	2	2	4	1	2	4	5	1	1	1	False	E	1
42	2	1	2	4	2	2	2	2	3	2	1	False	E	1
43	2	5	5	2	5	1	2	3	5	5	6	True	B	4
44	2	1	3	1	1	3	4	1	3	2	3	False	D	2
45	1	1	5	2	5	5	1	4	3	3	5	False	C	3
46	3	5	3	4	1	1	3	5	4	5	8	True	A	5
47	2	1	5	1	2	5	5	2	2	3	1	False	E	1
48	1	2	3	2	1	3	4	2	2	5	2	False	D	2
49	2	1	4	4	4	5	4	2	2	3	3	False	D	2
50	2	4	4	5	4	5	5	2	3	1	3	False	D	2
51	2	1	1	1	2	3	4	5	3	3	7	True	B	4
52	1	1	3	1	3	1	3	5	4	1	5	False	C	3
53	3	5	3	5	4	2	4	1	2	1	2	False	D	2
54	3	1	2	5	2	1	5	2	2	3	1	False	E	1
55	3	2	3	4	1	5	5	5	2	4	10	True	A	5
56	3	4	1	4	5	5	4	1	2	5	1	False	E	1
57	1	5	2	2	4	5	4	3	2	2	10	True
58	2	2	1	1	5	4	3	4	3	1	5	False
59	2	2	2	4	1	5	2	3	4	4	8	True
60	1	1	5	1	3	4	5	4	2	2	10	True
61	1	2	3	5	1	4	5	1	5	5	2	False
62	1	2	2	2	2	3	2	5	2	2	2	False
63	1	3	4	5	5	4	3	2	4	5	1	False
64	2	1	5	2	3	3	5	2	5	3	7	True
65	2	2	3	2	3	2	3	2	5	5	5	False
66	3	5	2	3	2	3	1	1	5	5	3	False
67	2	1	1	3	3	2	2	1	3	1	9	True
68	3	3	3	4	4	5	5	4	4	4	5	False
69	2	2	5	5	3	2	2	2	4	5	4	False
70	3	5	1	3	4	1	2	1	5	4	4	False
71	3	4	2	5	2	3	4	4	3	4	10	True
72	1	2	1	5	5	2	4	2	1	1	5	False
73	1	5	4	4	3	3	3	1	5	4	4	False
74	2	2	1	5	2	4	2	2	4	5	7	True
75	3	4	5	2	5	4	3	5	3	2	9	True
76	3	2	3	4	5	1	1	3	4	3	10	True
77	2	1	5	1	5	4	5	3	4	2	1	False
78	3	2	5	3	2	4	4	5	4	2	1	False
79	1	4	2	1	5	2	5	1	4	3	4	False
80	1	4	3	4	4	5	5	5	2	1	5	False
81	1	5	4	3	3	4	5	4	1	1	6	True
82	2	5	4	2	1	1	5	2	5	2	3	False
83	2	1	2	3	3	2	2	2	5	4	4	False
84	2	2	3	1	5	5	3	1	5	5	2	False
85	3	3	5	3	4	3	2	2	2	3	6	True
86	2	5	1	2	5	1	3	4	2	4	7	True
87	2	1	2	1	2	2	4	5	1	5	5	False
88	3	1	3	1	5	5	2	2	4	4	6	True
89	1	4	1	5	2	1	1	4	4	3	7	True
90	3	2	5	1	2	1	1	2	5	1	10	True
91	2	5	2	1	5	1	4	4	4	4	8	True
92	1	1	1	4	2	1	4	2	5	5	2	False
93	1	3	3	1	1	5	4	1	5	4	7	True
94	1	1	4	2	4	5	4	5	4	5	6	True
95	1	3	5	4	4	3	4	2	2	1	5	False
96	3	5	1	2	1	3	2	4	4	4	8	True
97	1	3	3	4	3	1	5	5	3	5	2	False
98	3	5	2	4	2	2	2	5	3	1	4	False
99	1	2	5	1	3	3	3	2	2	5	5	False
100	1	2	2	5	1	4	3	4	4	4	7	True
101	1	4	4	4	5	5	1	5	2	4	1	False
102	3	4	1	4	1	4	3	5	1	2	10	True
103	1	5	2	5	4	4	4	5	5	4	3	False
104	1	3	4	2	4	4	1	4	5	5	2	False
105	2	3	4	5	5	3	5	4	3	2	7	True
106	3	2	3	2	3	3	1	1	5	3	3	False
107	1	5	1	5	2	3	2	4	3	1	2	False
108	1	5	2	4	1	5	1	1	4	3	8	True
109	3	5	5	1	4	2	1	3	3	3	6	True
110	2	3	2	2	5	3	2	1	4	1	1	False
111	3	5	3	2	3	3	1	3	2	3	10	True
112	1	5	4	3	2	1	4	2	4	4	10	True
113	1	2	1	4	3	4	2	5	5	2	1	False
114	3	5	5	4	4	1	2	5	1	4	1	False
115	3	1	1	4	3	4	2	2	4	2	2	False
116	1	5	2	4	5	2	5	1	3	5	4	False
117	1	2	3	2	1	5	4	3	4	2	10	True
118	1	2	1	1	3	2	2	2	3	3	10	True
119	1	1	4	1	3	3	2	1	1	3	10	True
120	1	3	4	1	5	3	1	5	5	2	4	False
121	3	4	1	2	4	4	2	4	3	3	6	True
122	2	1	1	3	3	3	3	2	1	4	8	True
123	2	5	1	3	5	5	4	1	3	3	8	True
124	3	4	2	5	2	4	4	4	5	3	9	True
125	2	4	2	5	2	1	2	1	1	3	5	False
126	3	4	3	3	2	4	2	5	5	5	2	False
127	1	3	1	5	5	3	4	1	1	3	9	True
128	3	2	4	5	4	2	3	3	4	5	7	True
129	3	3	3	1	3	2	4	2	2	4	6	True
130	1	3	5	1	5	2	3	2	5	3	3	False
131	1	5	3	2	1	2	5	4	3	2	10	True
132	3	1	1	1	5	2	1	4	1	5	4	False
133	3	1	4	4	5	4	4	1	3	4	6	True
134	3	3	2	1	4	3	5	5	1	2	5	False
135	2	1	5	1	5	5	1	5	2	3	6	True
136	1	3	1	1	1	3	5	3	5	5	1	False
137	1	4	2	3	3	5	4	4	3	3	4	False
138	1	2	3	4	5	1	5	4	1	5	3	False
139	2	2	1	3	4	3	2	5	2	5	7	True
140	1	3	3	5	1	4	3	5	5	3	4	False
141	1	1	4	3	4	4	3	2	3	2	2	False
142	3	3	2	4	3	2	4	3	2	2	6	True
143	3	1	3	3	4	4	5	2	5	1	8	True
144	3	1	2	2	5	2	3	2	2	1	4	False
145	1	4	2	1	2	3	2	4	2	5	1	False
146	1	1	2	1	2	2	1	3	2	1	8	True
147	2	4	2	3	5	3	4	3	3	4	6	True
148	3	5	1	4	5	3	5	4	2	4	5	False
149	2	3	5	3	1	5	3	2	1	2	3	False
150	2	3	2	4	2	4	1	3	3	3	4	False
151	2	5	4	1	1	4	2	3	3	2	2	False
152	3	1	5	5	4	2	5	5	2	1	4	False
153	3	3	5	4	3	4	3	2	5	1	7	True
154	3	2	2	4	1	4	3	2	1	4	2	False
155	2	4	1	3	1	4	2	2	5	3	8	True
156	3	5	2	2	2	3	2	3	5	2	6	True
157	2	5	2	5	5	2	5	3	3	2	2	False
158	3	1	4	4	3	2	1	5	2	3	9	True
159	1	2	1	5	2	4	5	3	1	1	7	True
160	1	1	5	4	1	2	5	5	4	5	9	True
161	2	4	5	4	1	3	2	2	1	3	5	False
162	3	4	1	1	5	5	4	2	4	5	5	False
163	1	1	2	5	4	4	1	5	5	4	10	True
164	2	3	3	1	4	3	4	4	1	2	1	False
165	3	1	1	2	1	1	2	1	5	5	3	False
166	1	3	5	2	1	1	2	2	3	4	3	False
167	1	5	2	1	5	4	5	3	1	4	5	False
168	1	4	1	5	5	3	4	3	2	1	6	True
169	1	5	4	2	5	5	3	4	2	3	8	True
170	3	3	5	4	2	4	3	1	2	1	9	True
171	1	2	1	3	2	2	3	4	1	5	4	False
172	2	3	5	3	5	3	3	5	2	4	8	True
173	1	3	5	2	4	5	4	1	4	4	8	True
174	3	1	3	1	4	2	5	2	3	5	5	False
175	1	1	4	1	1	1	1	4	2	5	4	False
176	3	5	5	3	1	2	5	2	1	4	10	True
177	1	5	1	4	1	2	2	2	2	5	10	True
178	3	3	5	5	4	1	3	2	2	4	3	False
179	3	5	5	5	3	5	2	5	5	4	5	False
180	3	3	2	5	2	2	4	1	1	1	4	False
181	3	5	5	1	4	3	1	2	3	3	9	True
182	3	4	3	1	4	2	1	5	2	4	9	True
183	2	5	4	3	3	2	3	1	5	4	8	True
184	3	2	2	1	5	1	4	1	1	3	3	False
185	2	2	1	3	2	4	5	4	4	2	4	False
186	1	4	2	2	4	1	2	3	2	1	3	False
187	3	1	1	4	1	3	2	4	3	2	2	False
188	3	2	4	5	1	3	2	3	2	2	6	True
189	2	4	5	1	3	1	3	2	4	3	2	False
190	1	3	3	5	1	2	3	2	4	1	7	True
191	1	1	1	2	2	4	5	2	1	5	4	False
192	3	5	1	2	4	4	2	4	1	4	3	False
193	1	1	2	4	1	3	5	2	5	4	9	True
194	1	4	2	2	3	3	2	2	5	3	9	True
195	2	5	1	2	3	4	5	2	4	3	7	True
196	3	2	2	2	3	2	1	3	1	5	8	True
197	2	4	3	3	2	4	3	2	5	5	9	True
198	3	1	3	2	1	3	4	4	5	2	6	True
199	2	1	3	2	1	4	2	4	1	2	4	False
200	2	5	4	3	2	5	4	3	2	2	1	False
201	2	4	5	3	5	3	4	5	3	3	9	True
202	3	4	5	3	1	2	3	4	1	5	4	False
203	3	2	2	1	1	2	5	2	2	1	2	False
204	1	5	3	4	3	3	3	5	2	2	9	True
205	3	2	3	3	2	3	4	5	3	3	2	False
206	1	2	5	1	4	2	3	5	5	4	3	False
207	3	4	4	3	4	5	5	2	2	1	10	True
208	1	2	4	1	4	5	2	1	5	2	6	True
209	3	4	4	1	4	1	5	3	3	1	7	True
210	1	5	5	5	4	1	4	5	5	4	4	False
211	1	1	5	3	1	2	2	5	4	2	4	False
212	1	4	3	3	1	4	3	5	2	3	6	True
213	1	5	4	5	5	4	4	5	4	3	1	False
214	3	5	5	5	2	1	1	5	2	4	6	True
215	1	4	4	4	3	1	1	3	5	3	2	False
216	3	3	2	4	3	4	4	1	2	1	4	False
217	3	5	1	4	3	2	3	2	1	2	9	True
218	1	4	3	3	5	2	5	4	1	5	1	False
219	2	3	3	1	1	3	3	4	4	5	7	True
220	2	2	4	5	4	1	2	4	4	1	5	False
221	1	2	1	2	2	4	4	2	4	1	2	False
222	1	5	2	2	4	1	3	1	4	4	1	False
223	1	4	5	2	3	5	1	4	4	2	9	True
224	3	4	1	3	3	2	3	5	4	1	8	True
225	2	3	4	4	3	2	5	2	4	2	4	False
226	1	4	2	3	2	2	4	1	4	2	2	False
227	3	5	2	1	1	3	1	3	1	4	3	False
228	1	1	4	3	2	4	5	2	3	4	10	True
229	3	1	5	1	5	3	3	3	1	1	1	False
230	3	3	3	2	2	3	2	5	3	1	1	False
231	1	4	5	5	5	5	4	1	4	1	10	True
232	2	5	2	1	2	1	5	3	4	1	1	False
233	1	5	1	4	5	5	5	3	4	4	1	False
234	1	1	1	1	1	4	5	1	5	1	2	False
235	3	2	3	3	5	1	4	3	3	1	10	True
236	1	4	1	4	5	1	4	1	2	2	1	False
237	3	2	5	3	4	4	4	4	2	1	8	True
238	3	2	4	1	3	2	1	4	3	2	3	False
239	1	2	4	3	4	1	2	5	2	2	4	False
240	3	2	1	1	1	5	2	4	2	5	8	True
241	1	5	2	5	1	4	1	5	3	3	3	False
242	1	5	1	4	2	4	2	3	2	3	10	True
243	2	5	2	5	1	3	4	5	3	1	7	True
244	3	1	2	2	1	1	1	1	4	1	2	False
245	3	4	2	5	4	2	2	3	5	1	5	False
246	2	2	3	4	3	2	1	1	5	2	2	False
247	1	1	1	5	5	2	2	4	4	2	3	False
248	1	1	5	3	1	5	3	3	5	5	7	True
249	2	2	5	5	3	3	3	3	5	5	5	False
250	2	2	1	4	5	1	1	4	4	2	9	True
251	1	2	1	2	4	5	1	3	3	4	4	False
252	1	1	2	2	5	2	5	4	5	3	7	True
253	1	1	1	5	1	4	1	5	5	1	5	False
254	2	1	5	4	2	4	3	4	3	3	2	False
255	3	4	5	2	4	2	2	4	2	3	7	True
256	1	2	1	5	5	2	1	1	5	3	4	False
257	2	5	5	4	3	5	4	3	3	3	5	False
258	1	5	2	3	5	4	2	2	1	3	6	True
259	3	1	3	1	4	4	5	1	5	4	2	False
260	2	1	1	2	2	3	3	5	5	5	7	True
261	2	4	5	3	5	2	5	5	5	2	9	True
262	1	5	4	5	3	5	3	1	4	2	8	True
263	3	2	1	1	3	3	3	1	1	3	4	False
264	3	4	1	2	1	4	2	2	4	5	1	False
265	2	3	1	2	2	3	5	4	5	5	3	False
266	3	5	2	1	3	1	3	4	1	5	1	False
267	1	2	2	4	3	5	1	5	5	4	5	False
268	3	4	3	1	2	4	5	5	1	4	2	False
269	2	2	3	2	2	4	4	2	4	1	6	True
270	3	4	2	1	4	5	4	1	3	3	6	True
271	3	5	4	1	1	2	3	2	2	3	4	False
272	3	3	1	3	4	5	3	4	3	4	5	False
273	1	4	4	5	5	1	5	4	5	3	6	True
274	1	1	3	3	1	5	3	1	2	3	7	True
275	1	1	4	3	2	4	4	3	5	3	6	True
276	1	4	3	1	2	3	2	5	5	4	5	False
277	3	5	3	4	2	3	5	3	3	3	9	True
278	3	5	1	2	4	2	1	2	4	3	10	True
279	2	4	4	1	3	1	1	2	4	3	8	True
280	1	4	2	1	1	3	5	3	4	1	8	True
281	3	3	3	3	5	4	4	1	5	5	7	True
282	1	4	3	4	1	2	1	3	5	1	9	True
283	3	4	4	1	4	3	5	3	1	5	5	False
284	3	4	4	5	1	3	4	2	1	2	5	False
285	1	5	4	5	3	2	5	3	1	4	6	True
286	1	3	4	5	5	1	2	1	3	5	2	False
287	3	4	5	2	4	5	3	3	2	1	5	False
288	2	5	3	5	1	2	4	5	3	1	4	False
289	3	1	2	5	5	2	5	5	5	2	3	False
290	3	3	3	2	5	5	5	5	1	2	10	True
291	1	1	5	5	2	5	4	3	5	2	2	False
292	2	4	5	5	4	2	5	3	3	5	5	False
293	1	5	4	5	5	1	3	1	4	2	1	False
294	3	3	3	2	3	1	3	4	3	2	4	False
295	2	5	5	1	3	4	5	1	2	1	1	False
296	1	3	4	1	5	1	3	2	3	1	8	True
297	2	5	5	5	5	3	4	1	2	4	1	False
298	1	2	4	3	5	1	5	1	4	5	3	False
299	3	5	2	5	4	2	4	1	2	3	2	False
300	3	4	4	1	1	3	5	5	1	3	5	False
301	1	2	1	4	5	4	3	2	5	1	10	True
302	1	2	1	1	3	1	5	3	5	4	3	False
303	3	5	5	1	5	4	3	2	5	4	7	True
304	3	4	3	5	1	5	3	3	3	3	6	True
305	1	5	1	4	3	1	4	4	5	2	9	True
306	1	2	3	2	4	1	2	1	5	4	6	True
307	3	4	2	4	4	2	4	1	5	3	6	True
308	2	5	3	1	5	2	3	3	5	4	10	True
309	3	1	1	2	5	5	4	5	2	5	5	False
310	1	3	5	4	2	2	5	2	3	5	4	False
311	2	3	4	2	5	1	5	2	5	4	1	False
312	2	2	2	2	2	2	1	3	2	2	9	True
313	3	5	2	4	2	5	3	2	2	4	8	True
314	3	1	2	4	4	4	2	5	4	2	6	True
315	2	1	3	2	4	3	2	2	2	1	2	False
316	3	1	1	5	2	4	3	2	5	5	6	True
317	1	1	5	3	5	4	1	4	5	1	1	False
318	1	1	2	3	4	4	1	3	5	1	9	True
319	1	2	3	2	2	3	1	5	3	5	1	False
320	1	1	4	2	2	4	5	3	2	5	2	False
321	2	4	4	3	2	3	2	3	3	1	3	False
322	1	5	5	3	3	5	4	3	1	3	8	True
323	1	2	4	5	2	2	5	3	1	4	1	False
324	2	1	1	5	4	4	1	4	1	2	10	True
325	1	3	4	3	5	5	1	1	5	4	6	True
326	1	3	1	1	1	1	3	3	2	3	1	False
327	2	1	1	4	5	3	1	2	3	2	10	True
328	2	3	3	1	3	5	1	1	5	2	6	True
329	2	2	1	4	3	5	2	5	3	3	10	True
330	3	5	3	1	5	4	3	2	5	4	8	True
331	3	1	1	5	4	3	1	5	3	4	3	False
332	2	5	3	1	1	5	4	3	2	2	4	False
333	3	4	2	5	4	4	2	2	2	2	5	False
334	2	1	1	1	1	1	3	2	1	4	1	False
335	3	4	2	4	4	5	4	3	4	3	4	False
336	3	3	2	1	3	5	4	2	4	5	7	True
337	3	2	2	5	4	2	2	5	5	3	5	False
338	1	2	4	4	2	5	3	3	1	5	9	True
339	1	2	5	2	2	4	4	1	3	2	1	False
340	2	1	1	2	3	4	4	1	5	3	9	True
341	1	5	3	3	2	2	2	4	3	4	2	False
342	3	5	4	3	5	2	1	1	3	1	4	False
343	1	1	3	4	1	2	5	3	2	2	3	False
344	3	4	4	3	5	5	5	2	3	3	2	False
345	2	5	2	2	3	1	3	5	4	5	8	True
346	2	3	3	3	3	3	1	3	5	3	2	False
347	3	1	5	2	5	1	3	2	5	1	10	True
348	3	1	2	3	1	5	3	4	4	5	2	False
349	2	1	3	1	2	2	5	5	1	2	1	False
350	3	5	4	3	5	1	4	1	3	3	7	True
351	3	4	4	3	5	2	1	1	5	4	8	True
352	1	2	5	1	1	5	2	5	4	4	4	False
353	3	3	1	4	4	2	2	1	2	1	3	False
354	2	5	4	4	2	3	1	2	2	3	8	True
355	2	4	2	5	5	2	1	2	5	1	6	True
356	3	4	4	5	2	5	1	3	4	3	1	False
357	3	2	1	1	5	4	1	1	2	1	5	False
358	2	2	3	4	5	5	5	3	4	3	6	True
359	2	2	5	4	4	2	3	2	3	2	10	True
360	1	5	1	3	3	4	3	5	1	2	5	False
361	1	1	4	4	2	4	1	5	4	4	9	True
362	2	4	2	4	4	4	1	1	4	1	8	True
363	2	1	5	1	5	1	4	4	1	3	2	False
364	1	5	2	3	5	2	3	2	5	4	1	False
365	2	3	3	3	2	3	1	2	3	1	3	False
366	1	3	3	3	1	1	1	5	3	5	6	True
367	2	5	1	5	5	5	5	1	5	2	8	True
368	2	1	3	1	5	5	1	2	2	1	5	False
369	2	3	5	5	4	1	1	3	4	1	3	False
370	1	5	1	4	5	2	1	1	1	1	5	False
371	3	2	5	1	1	4	2	3	1	1	1	False
372	2	3	5	4	4	5	2	2	5	3	4	False
373	3	3	3	4	5	3	3	1	3	2	4	False
374	2	4	3	1	4	3	3	5	4	1	4	False
375	2	2	4	5	5	2	4	1	5	1	6	True
376	1	4	5	4	4	1	2	2	1	3	4	False
377	2	1	2	4	3	3	1	1	2	4	2	False
378	1	5	5	5	2	5	5	2	4	3	2	False
379	2	3	4	3	2	4	1	5	4	3	4	False
380	2	3	1	4	5	3	2	2	1	2	2	False
381	2	2	5	3	4	2	5	3	3	1	9	True
382	2	2	5	3	3	5	1	4	2	2	5	False
383	3	2	2	3	5	2	2	5	3	5	4	False
384	3	2	3	5	2	1	5	2	2	5	3	False
385	2	2	4	3	5	1	5	1	3	4	3	False
386	3	5	1	4	4	3	3	2	1	4	10	True
387	2	5	2	2	5	3	2	5	3	5	3	False
388	2	2	2	3	4	2	1	4	3	5	8	True
389	1	4	3	4	3	5	2	3	2	3	8	True
390	3	3	5	3	2	2	2	1	2	5	1	False
391	2	4	1	1	4	3	1	2	1	1	10	True
392	1	4	3	2	5	4	3	5	1	1	6	True
393	3	5	5	2	2	1	5	3	2	5	8	True
394	1	3	2	3	2	1	2	5	4	1	2	False
395	2	3	2	2	2	2	4	4	3	2	5	False
396	1	5	4	1	3	4	5	3	3	3	2	False
397	3	3	5	4	1	2	5	2	3	5	3	False
398	2	2	3	1	3	5	5	1	3	3	8	True
399	1	4	4	3	1	3	2	5	3	1	3	False
400	1	4	5	5	3	1	2	4	1	2	5	False
401	3	1	2	4	2	4	4	2	5	2	8	True
402	1	1	3	1	1	1	1	2	3	5	8	True
403	3	3	1	1	4	3	3	3	5	4	3	False
404	1	5	2	3	3	5	5	1	3	5	8	True
405	2	2	3	5	4	1	5	1	2	3	5	False
406	1	5	3	2	3	3	1	1	2	5	9	True
407	2	5	3	1	3	3	3	5	3	4	4	False
408	1	1	2	4	4	2	3	4	1	2	7	True
409	3	4	2	2	3	1	3	4	3	2	6	True
410	3	1	2	1	1	5	3	1	2	5	7	True
411	2	2	1	4	5	4	3	5	3	1	10	True
412	1	4	2	5	3	5	1	3	4	3	3	False
413	2	4	4	4	3	2	4	1	1	5	9	True
414	2	2	1	4	2	3	1	4	3	2	9	True
415	2	3	4	2	3	3	2	1	1	1	4	False
416	1	1	5	2	1	4	1	1	5	4	10	True
417	1	3	3	5	4	4	2	4	5	3	1	False
418	2	4	5	1	2	3	3	5	1	3	4	False
419	1	4	1	4	5	1	2	5	2	5	6	True
420	2	1	2	5	5	2	1	1	2	3	9	True
421	1	1	2	3	2	4	4	2	2	5	4	False
422	3	4	5	2	4	4	2	5	2	5	7	True
423	3	5	1	5	4	1	1	3	1	1	3	False
424	2	4	5	3	2	2	4	2	1	1	4	False
425	3	2	3	3	2	5	4	5	1	2	5	False
426	1	2	2	2	3	1	4	1	5	2	4	False
427	1	2	3	5	4	3	3	5	4	3	3	False
428	1	2	5	4	3	2	3	1	3	4	8	True
429	3	3	3	1	5	5	1	3	1	1	3	False
430	2	4	3	3	5	2	2	1	1	5	2	False
431	3	3	2	3	5	2	2	2	5	1	3	False
432	2	2	5	4	5	3	1	2	2	2	5	False
433	3	3	4	2	3	3	5	4	5	1	9	True
434	2	3	2	2	5	4	1	5	3	4	7	True
435	3	2	1	5	3	2	1	4	1	4	10	True
436	1	3	2	3	5	2	2	4	2	5	1	False
437	3	4	1	1	2	2	2	5	2	2	4	False
438	2	2	4	3	1	3	1	3	4	5	5	False
439	3	5	2	2	3	4	2	2	5	3	1	False
440	1	3	1	5	3	3	5	5	3	3	2	False
441	1	1	5	2	3	4	4	2	5	2	10	True
442	2	1	4	1	5	4	3	3	3	2	7	True
443	3	3	1	2	3	5	5	4	4	1	6	True
444	2	1	4	1	3	3	4	5	2	5	10	True
445	2	1	4	2	1	3	1	5	5	5	4	False
446	3	1	2	2	2	4	3	3	3	1	3	False
447	3	2	4	1	3	1	1	4	5	5	7	True
448	3	1	3	1	1	3	5	2	3	2	9	True
449	3	3	3	5	2	4	2	4	5	1	5	False
450	3	1	3	1	5	3	1	5	5	3	3	False
451	3	3	4	2	2	3	5	5	2	3	7	True
452	1	3	2	1	3	3	2	5	3	1	8	True
453	3	5	2	2	1	2	5	2	1	5	2	False
454	1	4	4	2	4	5	5	3	2	2	7	True
455	1	1	4	4	1	1	2	3	2	4	4	False
456	1	4	2	5	2	5	1	3	1	3	3	False
457	3	4	1	2	3	1	5	3	5	1	5	False
458	1	2	5	2	2	4	3	4	1	1	2	False
459	3	2	1	3	1	2	5	1	3	4	3	False
460	2	5	2	4	5	1	4	2	3	5	3	False
461	2	5	3	2	2	1	5	5	4	3	1	False
462	2	3	2	2	2	3	2	1	2	5	5	False
463	1	5	1	1	1	5	1	3	3	1	6	True
464	3	3	3	3	3	3	3	2	3	1	8	True
465	1	5	5	2	4	1	1	4	1	5	6	True
466	3	2	2	2	2	3	5	2	3	5	3	False
467	1	2	1	2	3	1	1	1	4	5	2	False
468	3	5	1	1	2	2	5	1	1	1	6	True
469	2	1	2	4	2	4	4	3	5	4	3	False
470	1	2	1	4	1	3	4	1	3	4	6	True
471	1	3	2	1	2	1	3	2	3	4	10	True
472	1	1	2	1	5	2	1	5	4	5	2	False
473	2	1	2	4	2	1	2	1	5	2	6	True
474	2	5	5	3	5	5	2	3	1	4	10	True
475	3	5	3	5	3	3	4	4	5	1	4	False
476	2	1	4	2	1	2	5	1	1	2	8	True
477	2	2	2	3	2	2	5	2	5	2	5	False
478	2	1	2	4	2	3	3	2	1	2	4	False
479	2	4	4	2	3	5	4	1	1	4	6	True
480	2	2	5	2	4	5	1	5	5	2	9	True
481	1	4	5	1	5	1	4	5	4	4	6	True
482	3	5	2	4	4	5	1	2	3	1	2	False
483	3	5	5	5	5	5	5	4	3	5	2	False
484	2	3	2	4	3	1	3	3	5	5	6	True
485	1	1	4	3	2	2	2	3	2	1	1	False
486	2	1	4	5	1	2	1	5	3	1	9	True
487	2	1	4	1	4	4	2	2	3	3	1	False
488	2	1	1	3	5	2	4	3	5	4	3	False
489	1	5	1	2	5	1	3	1	3	4	8	True
490	1	4	1	2	5	1	4	3	5	4	7	True
491	1	4	5	4	2	1	2	3	2	1	5	False
492	2	4	3	1	4	3	4	1	1	3	1	False
493	1	4	2	4	3	4	4	5	3	4	4	False
494	2	3	5	2	2	2	2	1	4	3	5	False
495	1	5	3	2	4	2	5	5	4	4	10	True
496	1	1	2	3	3	2	5	4	1	2	9	True
497	3	2	5	5	3	2	1	2	1	3	5	False
498	2	4	3	2	1	1	2	1	4	1	10	True
499	1	5	2	5	5	2	4	5	1	5	1	False
500	1	2	4	2	3	2	5	1	3	5	5	False
501	1	5	4	1	3	2	4	1	1	2	6	True
502	2	3	3	1	1	3	2	1	3	4	5	False
503	1	1	4	4	3	2	2	5	1	2	8	True
504	3	5	4	3	1	5	2	4	1	3	5	False
505	1	1	4	2	4	3	2	5	5	4	8	True
506	3	2	3	2	4	5	5	1	4	3	7	True
507	1	4	1	3	5	2	1	3	4	3	1	False
508	2	1	3	5	5	3	1	4	3	3	9	True
509	1	4	3	2	2	5	3	1	2	5	4	False
510	2	4	1	1	2	3	4	3	5	3	3	False
511	1	3	1	2	4	1	1	1	1	2	9	True
512	2	3	3	1	3	1	5	1	1	3	5	False
513	2	4	1	1	3	3	3	5	3	5	5	False
514	1	5	1	3	1	4	5	1	1	5	9	True
515	1	3	1	1	1	3	2	5	5	5	3	False
516	3	3	5	3	2	3	1	2	4	2	9	True
517	2	4	3	5	4	1	4	1	5	4	7	True
518	2	5	5	2	5	5	3	2	4	3	6	True
519	2	3	1	1	3	4	1	3	2	5	1	False
520	2	1	4	1	2	4	5	1	2	1	1	False
521	2	2	5	3	2	3	5	5	1	5	9	True
522	3	5	1	5	1	5	5	4	1	3	4	False
523	1	4	5	1	2	5	1	4	2	1	1	False
524	1	5	4	1	1	4	3	1	5	5	9	True
525	3	1	1	3	2	5	3	5	5	3	6	True
526	3	1	1	4	2	1	5	5	1	4	1	False
527	3	5	3	2	4	3	3	4	2	3	6	True
528	1	4	5	2	5	2	5	4	1	1	8	True
529	3	4	2	2	4	5	1	1	5	5	1	False
530	2	3	2	4	1	5	4	4	4	4	10	True
531	3	3	1	4	5	1	4	4	5	3	10	True
532	1	3	3	5	1	1	1	4	5	1	2	False
533	3	2	2	2	1	5	1	3	1	3	8	True
534	2	5	2	1	5	3	3	1	4	5	2	False
535	2	3	1	1	4	3	4	4	5	5	6	True
536	2	3	1	1	2	4	2	3	5	5	1	False
537	1	3	5	1	2	1	2	1	2	5	3	False
538	2	1	3	2	1	5	1	5	1	4	8	True
539	3	5	4	2	3	3	4	3	4	3	7	True
540	2	3	1	4	1	4	4	1	4	1	10	True
541	2	5	1	2	4	1	5	4	2	2	8	True
542	2	5	5	1	4	3	4	4	4	5	8	True
543	2	3	1	4	1	3	5	3	4	2	3	False
544	2	4	5	4	4	2	5	2	1	4	9	True
545	1	4	1	2	1	5	2	1	3	2	3	False
546	2	5	4	1	3	4	2	4	4	2	1	False
547	2	5	2	4	5	3	1	1	5	4	7	True
548	2	2	3	2	3	4	4	1	1	5	4	False
549	1	1	1	2	3	5	1	1	2	3	5	False
550	3	4	1	3	3	2	5	5	3	2	9	True
551	2	1	1	4	1	3	3	5	1	1	5	False
552	3	4	1	5	2	2	1	2	4	1	3	False
553	1	1	5	3	3	3	1	2	3	2	3	False
554	3	5	4	4	4	1	2	5	5	4	7	True
555	1	2	5	4	4	4	2	2	1	3	8	True
556	1	1	4	4	2	3	2	5	2	5	5	False
557	2	1	5	1	3	1	5	5	1	3	5	False
558	2	3	3	5	1	5	2	1	3	4	3	False
559	2	4	2	3	5	2	3	5	2	4	4	False
560	3	1	3	2	1	2	4	3	3	4	3	False
561	1	4	1	4	3	5	5	5	1	3	2	False
562	1	1	4	1	4	1	1	2	1	2	6	True
563	3	5	4	3	1	3	3	2	5	4	8	True
564	2	5	3	3	1	2	5	2	1	4	8	True
565	2	4	4	5	1	1	2	2	5	4	4	False
566	3	2	1	5	1	3	5	1	1	2	10	True
567	1	5	3	2	3	2	1	4	3	5	4	False
568	1	4	3	1	3	3	3	5	4	4	7	True
569	2	4	1	2	3	2	3	4	4	1	9	True
570	2	3	5	5	5	3	5	3	4	2	9	True
571	2	1	5	4	2	1	2	2	2	3	10	True
572	1	2	2	3	2	2	4	5	2	3	6	True
573	3	3	4	4	5	2	1	3	3	5	10	True
574	1	1	1	2	2	4	3	1	1	5	8	True
575	1	1	1	2	1	5	5	4	4	4	7	True
576	1	5	3	2	1	3	3	2	2	4	2	False
577	2	2	3	2	2	3	5	1	4	1	8	True
578	2	1	1	5	4	5	5	3	2	4	1	False
579	3	2	4	3	4	3	3	3	3	2	1	False
580	1	5	5	3	1	5	4	2	5	3	9	True
581	2	2	3	3	5	4	3	3	2	5	5	False
582	1	2	3	1	2	5	2	4	4	4	3	False
583	2	4	5	5	3	1	3	2	5	4	2	False
584	2	5	1	3	1	5	3	1	2	1	1	False
585	1	4	5	1	5	3	1	2	5	2	9	True
586	1	5	1	5	3	3	4	3	1	4	3	False
587	1	5	2	4	2	4	3	5	3	3	6	True
588	2	5	5	4	5	3	1	5	5	5	5	False
589	3	1	1	1	4	3	1	5	2	5	6	True
590	1	4	5	1	1	3	2	1	1	4	5	False
591	3	2	5	4	5	3	5	2	1	1	7	True
592	3	4	2	5	1	3	3	4	2	4	10	True
593	3	1	5	2	5	4	5	1	2	4	9	True
594	1	4	2	2	5	4	5	5	2	4	3	False
595	2	3	3	3	1	1	3	1	4	3	10	True
596	3	1	2	1	5	5	5	1	2	4	1	False
597	2	4	4	1	1	1	4	3	1	3	4	False
598	2	1	4	5	4	3	2	3	5	3	8	True
599	2	3	3	2	4	5	5	4	1	1	9	True
600	3	3	2	3	4	5	2	5	4	4	10	True
601	3	3	1	4	2	4	5	1	3	2	4	False
602	1	3	2	3	5	4	3	2	3	4	8	True
603	2	3	5	2	2	1	5	2	3	1	3	False
604	3	2	1	3	5	1	2	1	3	5	5	False
605	3	2	4	1	1	1	2	5	2	3	6	True
606	1	1	2	4	4	2	5	3	3	3	10	True
607	2	4	4	2	4	1	5	2	2	4	5	False
608	3	3	5	4	4	2	4	3	2	3	9	True
609	1	1	1	2	1	4	1	5	4	4	10	True
610	3	5	4	2	5	5	5	1	4	2	8	True
611	2	4	3	2	2	4	1	3	2	4	5	False
612	1	1	2	3	2	3	3	2	4	4	10	True
613	2	2	2	5	2	2	2	1	4	2	8	True
614	3	5	5	3	4	4	1	4	2	4	2	False
615	2	3	3	1	3	3	4	3	4	3	6	True
616	2	1	2	4	4	5	3	1	1	4	10	True
617	2	2	3	5	1	2	1	5	4	2	9	True
618	2	2	3	5	1	4	5	3	4	5	6	True
619	1	3	3	4	2	3	3	1	3	1	3	False
620	2	2	1	4	2	4	1	2	5	5	1	False
621	1	4	4	2	5	5	2	3	3	2	9	True
622	1	1	2	1	3	3	2	5	1	2	8	True
623	2	1	1	5	3	1	1	4	4	4	7	True
624	3	4	5	5	3	3	5	1	5	4	6	True
625	2	1	5	3	1	2	4	1	5	1	10	True
626	3	5	2	1	3	4	5	2	4	3	2	False
627	1	2	3	3	4	1	4	2	2	1	8	True
628	3	1	4	2	2	5	1	4	2	3	5	False
629	2	5	1	2	3	1	1	1	4	2	7	True
630	3	2	1	1	1	2	5	2	1	2	5	False
631	2	3	3	2	3	2	5	5	4	3	1	False
632	1	2	2	5	2	1	5	3	2	2	7	True
633	1	5	5	3	1	2	1	1	3	2	8	True
634	1	3	5	2	4	3	4	4	1	5	8	True
635	1	4	2	4	3	2	2	3	3	1	9	True
636	1	3	2	3	2	5	2	1	2	2	10	True
637	3	4	3	1	2	4	3	1	5	5	6	True
638	1	5	4	1	2	1	4	2	3	5	9	True
639	1	3	2	3	1	4	4	2	4	4	1	False
640	3	2	5	3	5	4	3	5	1	4	2	False
641	3	3	4	5	5	3	3	1	5	1	3	False
642	2	1	4	4	3	1	1	5	5	4	7	True
643	3	1	3	5	5	1	3	4	1	3	4	False
644	3	5	3	4	2	5	4	5	4	4	5	False
645	2	4	5	5	5	4	1	3	1	1	1	False
646	2	4	5	1	3	1	5	4	3	3	2	False
647	3	1	2	5	4	4	2	1	5	3	4	False
648	3	2	3	1	1	3	1	5	5	2	5	False
649	3	5	3	1	3	4	2	5	3	3	10	True
650	2	3	4	2	2	5	2	1	2	1	3	False
651	2	4	2	2	1	1	1	2	5	5	9	True
652	1	5	3	4	4	2	2	5	3	4	5	False
653	1	3	1	4	2	3	5	5	4	3	5	False
654	2	5	1	4	4	2	5	1	3	3	3	False
655	1	5	4	2	3	3	2	3	3	3	5	False
656	1	3	1	2	2	2	5	3	3	1	3	False
657	2	5	1	5	1	1	4	2	4	5	2	False
658	3	1	5	3	2	1	1	3	2	2	9	True
659	1	1	4	2	3	5	1	2	1	2	5	False
660	1	1	2	3	5	2	5	4	1	1	6	True
661	2	4	4	1	5	3	4	3	1	2	1	False
662	3	5	5	3	1	1	5	2	4	4	7	True
663	2	5	3	2	2	5	5	2	4	2	2	False
664	2	3	2	2	1	3	3	2	2	1	7	True
665	3	1	3	1	2	1	2	3	2	5	7	True
666	3	5	3	4	5	4	4	3	3	5	8	True
667	3	1	1	3	3	3	2	1	2	5	1	False
668	1	1	5	1	3	1	4	5	4	4	9	True
669	2	2	5	2	4	2	1	1	5	3	8	True
670	1	5	2	2	2	1	2	5	3	4	9	True
671	2	5	2	5	2	1	1	1	4	4	8	True
672	2	5	2	4	4	5	1	1	2	4	10	True
673	1	5	2	2	1	3	4	5	5	2	8	True
674	3	3	4	3	4	4	3	3	4	1	5	False
675	3	1	5	2	2	3	3	5	2	3	5	False
676	1	5	5	4	1	3	5	4	1	4	2	False
677	1	1	4	4	5	5	2	3	5	5	10	True
678	3	4	5	2	1	2	3	5	3	2	9	True
679	3	1	4	1	1	1	2	1	5	4	6	True
680	1	4	1	3	4	2	2	1	5	4	9	True
681	1	5	5	5	4	4	2	3	2	3	8	True
682	3	3	2	4	4	4	5	3	5	2	9	True
683	2	1	3	4	3	3	2	3	1	2	1	False
684	3	1	4	2	1	2	2	1	1	1	3	False
685	1	2	2	2	2	5	2	2	3	5	9	True
686	2	3	2	4	2	5	1	3	3	3	8	True
687	1	2	5	3	3	2	2	5	3	4	10	True
688	2	2	3	1	1	4	4	5	2	3	3	False
689	1	2	4	1	5	5	2	1	4	2	5	False
690	1	2	4	1	4	4	5	2	2	4	6	True
691	2	2	5	2	1	2	3	3	3	1	4	False
692	1	2	4	1	2	3	1	2	5	3	4	False
693	1	5	1	3	2	1	4	4	3	3	3	False
694	2	2	5	3	4	3	5	2	1	2	6	True
695	3	5	4	4	5	1	4	3	5	2	3	False
696	3	1	2	1	2	2	5	2	3	3	7	True
697	2	1	5	2	1	5	5	2	2	4	3	False
698	1	3	4	3	2	1	3	5	5	5	4	False
699	3	1	2	1	1	4	4	5	1	5	4	False
700	2	2	1	1	2	5	2	1	2	4	8	True
701	1	3	1	1	4	5	2	4	5	2	5	False
702	1	5	5	5	4	2	3	1	1	5	7	True
703	2	4	5	5	2	3	1	2	1	2	9	True
704	1	3	3	5	5	2	2	5	1	5	7	True
705	3	2	1	5	2	1	3	2	4	5	9	True
706	2	1	4	2	2	3	3	4	3	1	9	True
707	3	5	5	3	3	4	2	3	1	5	5	False
708	2	4	1	4	2	3	4	1	3	1	9	True
709	3	3	3	5	1	1	3	4	3	5	10	True
710	2	3	2	5	1	4	2	4	2	5	10	True
711	3	4	3	5	3	2	5	4	5	5	6	True
712	3	4	1	4	5	3	5	5	5	1	8	True
713	2	5	2	2	3	3	3	1	5	5	5	False
714	2	1	5	3	2	2	2	2	1	3	4	False
715	3	2	3	5	2	4	5	5	1	2	6	True
716	2	4	1	4	5	4	1	1	5	3	8	True
717	3	1	1	3	5	3	4	1	3	2	8	True
718	2	2	2	5	3	5	2	4	5	5	9	True
719	3	4	5	4	5	2	1	3	3	3	6	True
720	2	2	4	2	3	5	1	1	2	3	3	False
721	3	1	4	5	1	1	1	4	3	3	1	False
722	3	4	2	2	1	2	4	1	2	3	7	True
723	2	3	1	5	5	2	2	2	4	1	4	False
724	1	2	4	1	3	3	3	5	4	3	10	True
725	1	2	1	2	1	3	5	4	4	1	2	False
726	2	4	1	3	5	4	3	5	1	3	9	True
727	2	5	5	5	2	5	1	1	3	4	4	False
728	3	1	3	3	5	3	3	2	1	2	3	False
729	1	5	5	1	3	3	2	2	4	4	10	True
730	2	3	5	5	5	1	2	5	4	2	7	True
731	1	5	3	2	2	1	1	2	4	2	3	False
732	2	1	1	5	1	3	4	3	1	4	1	False
733	3	1	3	4	4	2	5	5	4	2	8	True
734	3	2	2	4	2	2	3	2	1	2	7	True
735	2	1	1	3	1	1	5	4	1	5	2	False
736	2	3	3	4	5	5	4	3	1	4	4	False
737	2	1	3	3	4	5	3	3	1	4	5	False
738	2	2	2	1	1	1	1	3	1	2	1	False
739	2	2	4	1	4	3	1	4	2	2	8	True
740	3	5	5	4	3	4	5	5	4	3	10	True
741	1	2	3	2	1	5	1	2	5	4	1	False
742	1	3	3	1	3	4	1	4	4	4	6	True
743	2	3	3	3	3	3	3	3	2	5	4	False
744	2	1	2	2	5	5	1	5	5	4	8	True
745	2	1	1	1	4	1	3	3	5	3	10	True
746	2	3	4	1	5	5	5	5	1	2	8	True
747	2	4	3	3	5	1	2	1	3	4	4	False
748	2	5	1	1	1	1	5	4	2	1	8	True
749	2	1	2	3	5	4	4	1	3	2	9	True
750	3	3	5	3	2	4	4	4	3	2	3	False
751	2	5	1	5	3	2	1	2	2	2	10	True
752	3	3	3	1	4	5	5	1	3	1	8	True
753	1	2	2	3	2	1	2	4	5	4	2	False
754	3	3	4	5	4	1	1	2	5	4	7	True
755	3	1	2	4	2	4	5	2	4	2	3	False
756	2	1	2	2	2	2	4	3	2	2	6	True
757	2	3	5	3	1	2	5	3	3	1	6	True
758	2	4	3	1	1	5	5	5	4	2	9	True
759	1	3	3	5	5	3	5	4	3	1	10	True
760	2	5	3	5	1	3	5	5	5	3	3	False
761	1	1	5	2	3	2	5	1	4	1	8	True
762	2	5	3	5	2	4	5	1	5	3	8	True
763	2	4	3	4	4	5	3	4	1	3	1	False
764	1	1	1	5	3	2	1	3	2	3	9	True
765	3	3	3	4	4	3	5	1	2	5	10	True
766	1	5	1	3	2	1	1	3	3	5	8	True
767	2	5	1	5	2	1	3	2	3	5	3	False
768	2	3	3	5	3	3	3	5	4	4	6	True
769	1	5	1	3	4	4	1	2	5	1	4	False
770	3	5	2	5	4	1	2	2	1	3	6	True
771	3	1	3	1	4	1	2	5	3	3	2	False
772	1	4	1	5	2	2	1	4	4	3	9	True
773	2	2	4	3	5	4	4	4	3	5	10	True
774	3	3	2	2	5	5	4	5	2	2	4	False
775	2	3	1	3	5	3	4	2	1	2	3	False
776	1	3	5	4	1	1	5	2	4	5	7	True
777	2	4	1	1	4	4	4	5	3	4	8	True
778	1	3	5	4	1	2	3	4	1	3	6	True
779	2	3	3	4	3	4	4	1	2	2	8	True
780	3	5	5	2	5	2	2	2	5	1	7	True
781	1	2	4	1	2	5	4	3	2	4	4	False
782	1	5	5	1	4	4	3	3	4	5	2	False
783	1	1	2	4	3	3	5	4	5	4	5	False
784	2	3	2	5	2	5	3	2	2	5	8	True
785	3	1	2	1	2	5	5	4	1	3	5	False
786	1	2	3	5	5	2	2	2	2	4	6	True
787	2	2	2	4	3	3	3	2	5	3	2	False
788	3	4	5	5	3	1	1	4	3	2	6	True
789	3	2	1	5	4	1	3	4	3	3	10	True
790	3	3	2	5	4	1	2	3	4	3	9	True
791	2	2	3	5	3	4	1	5	1	4	2	False
792	1	4	1	4	5	1	4	1	4	4	8	True
793	1	5	1	4	4	3	3	1	3	2	10	True
794	2	4	5	3	2	5	5	5	3	3	3	False
795	2	1	4	5	2	3	4	1	1	2	7	True
796	1	1	4	1	3	4	3	4	5	2	5	False
797	1	4	3	1	3	3	3	1	3	2	10	True
798	2	1	4	1	3	5	1	4	3	5	9	True
799	1	5	4	4	3	3	2	3	3	5	2	False
800	3	4	4	5	4	5	1	5	4	1	5	False
801	1	5	2	3	5	2	1	1	1	3	2	False
802	1	3	1	4	1	3	5	3	4	4	9	True
803	3	3	3	2	2	5	3	4	3	3	10	True
804	2	3	2	1	3	3	5	4	1	3	1	False
805	2	3	1	5	4	2	4	5	3	4	9	True
806	2	3	3	5	1	1	3	1	4	3	3	False
807	2	2	3	5	3	2	4	5	5	2	5	False
808	2	5	3	5	4	4	2	1	3	3	4	False
809	1	4	4	4	3	4	2	4	5	5	10	True
810	1	1	4	5	4	5	4	1	4	2	3	False
811	2	5	5	1	5	5	4	1	3	3	5	False
812	1	5	5	4	3	2	4	5	4	5	4	False
813	3	4	2	4	2	5	4	1	4	3	6	True
814	3	4	5	4	4	5	5	1	1	3	9	True
815	1	2	2	2	4	3	1	4	3	3	6	True
816	2	4	3	1	2	2	3	5	2	3	6	True
817	2	1	4	4	1	2	1	4	4	4	4	False
818	2	4	4	3	2	5	4	3	1	4	6	True
819	1	2	2	3	1	3	5	2	3	5	7	True
820	1	1	1	1	4	1	3	4	3	1	5	False
821	2	2	3	4	4	2	2	5	3	3	10	True
822	1	4	2	5	1	1	4	3	2	4	8	True
823	2	3	2	1	4	4	2	1	4	2	1	False
824	1	4	5	4	2	1	4	2	3	1	6	True
825	2	5	1	5	2	2	4	5	1	1	4	False
826	3	5	3	3	5	2	4	3	3	1	7	True
827	3	3	3	1	1	3	5	3	2	2	7	True
828	2	2	1	2	5	4	1	4	2	1	4	False
829	1	5	3	5	4	3	1	3	5	2	7	True
830	1	1	5	4	4	4	5	1	4	5	9	True
831	3	4	3	2	5	3	5	2	5	1	5	False
832	1	3	4	1	4	1	3	4	4	1	5	False
833	3	5	1	3	2	4	1	2	1	5	5	False
834	2	4	4	5	2	3	3	4	4	5	2	False
835	3	4	3	5	3	2	4	2	5	2	6	True
836	3	1	1	3	3	4	3	5	1	1	7	True
837	3	4	5	1	4	5	2	1	2	4	2	False
838	1	2	4	5	1	2	3	3	2	1	6	True
839	3	2	1	5	3	3	4	3	1	2	8	True
840	1	4	2	4	3	4	1	4	2	2	8	True
841	1	2	3	4	2	2	5	1	3	2	7	True
842	3	1	4	5	2	3	4	5	5	4	6	True
843	2	2	2	4	3	5	1	4	4	4	1	False
844	1	5	2	5	5	3	4	5	5	3	9	True
845	1	5	3	4	5	2	4	4	5	1	4	False
846	2	1	3	5	1	1	2	1	3	4	1	False
847	2	1	5	3	3	1	4	5	1	3	5	False
848	1	1	5	4	2	1	2	5	1	5	7	True
849	3	1	4	2	1	3	5	3	1	4	9	True
850	2	2	2	1	5	2	4	3	4	2	7	True
851	3	5	3	2	1	2	5	1	4	5	8	True
852	1	1	5	5	5	1	2	4	3	4	9	True
853	3	2	4	1	1	4	5	3	1	3	3	False
854	3	4	3	1	3	1	4	5	3	5	8	True
855	1	3	5	1	3	1	1	2	5	4	8	True
856	3	2	4	3	3	3	4	1	4	5	3	False
857	1	5	2	1	5	5	5	1	3	1	3	False
858	2	2	3	3	1	1	3	3	2	5	4	False
859	2	5	5	4	5	1	2	2	4	2	6	True
860	3	3	4	3	2	1	2	3	4	1	8	True
861	1	5	1	4	2	2	4	5	2	5	3	False
862	1	1	1	3	2	5	3	5	1	2	2	False
863	2	2	5	4	3	2	1	1	4	3	1	False
864	1	1	2	2	1	1	3	2	3	5	1	False
865	1	2	3	3	1	1	1	1	4	1	4	False
866	3	4	1	5	4	2	4	2	5	1	7	True
867	3	5	2	3	5	5	3	4	4	1	7	True
868	3	5	5	3	1	5	4	4	3	5	3	False
869	1	4	1	1	3	5	3	1	3	2	7	True
870	1	4	4	2	1	4	2	4	4	1	10	True
871	2	5	5	4	4	2	4	5	3	2	10	True
872	2	1	4	4	4	2	2	4	2	5	9	True
873	1	2	1	3	4	4	3	4	2	5	5	False
874	3	4	4	1	5	1	5	1	1	5	3	False
875	3	2	3	3	5	1	3	2	1	2	6	True
876	3	3	5	4	5	1	1	3	2	5	9	True
877	2	4	2	1	3	1	3	4	2	5	2	False
878	3	4	3	3	4	2	2	4	3	4	2	False
879	2	3	4	4	4	5	2	4	1	1	2	False
880	1	3	4	3	3	2	4	1	1	5	9	True
881	1	1	4	1	5	2	4	1	4	4	2	False
882	2	5	2	5	3	1	1	5	1	2	10	True
883	1	1	2	4	2	2	2	3	4	5	8	True
884	1	3	2	5	4	4	5	1	1	4	7	True
885	3	5	1	3	5	1	5	4	2	2	6	True
886	2	5	3	3	2	2	3	3	3	4	6	True
887	3	2	3	5	1	1	5	3	5	2	3	False
888	1	4	3	2	3	3	3	5	4	3	5	False
889	2	3	2	5	1	2	3	2	3	3	10	True
890	1	1	1	2	2	1	3	1	4	1	2	False
891	2	3	5	4	1	2	4	5	4	2	1	False
892	1	4	4	5	1	1	3	5	2	2	7	True
893	1	5	2	3	1	5	4	2	1	4	4	False
894	1	2	3	3	5	1	2	4	4	1	8	True
895	1	4	5	1	3	3	2	3	4	5	6	True
896	1	1	4	1	3	2	4	3	1	3	7	True
897	3	2	3	4	2	4	5	1	3	5	10	True
898	3	3	3	3	3	2	5	2	5	5	6	True
899	2	5	4	4	4	5	4	1	5	1	7	True
900	2	2	4	2	4	3	1	2	1	3	5	False
901	1	1	3	2	2	1	2	5	4	1	4	False
902	3	3	2	3	4	1	1	2	5	2	2	False
903	3	2	1	4	5	2	5	1	2	5	1	False
904	3	1	5	1	2	2	2	1	2	5	10	True
905	3	3	1	4	5	2	3	4	4	1	6	True
906	2	4	5	4	2	3	5	1	3	4	9	True
907	1	5	2	2	2	1	4	2	4	5	3	False
908	3	5	1	4	5	4	5	3	4	5	10	True
909	1	1	3	4	1	2	3	1	3	4	8	True
910	1	4	2	1	4	5	5	5	3	1	1	False
911	1	2	2	3	2	2	3	5	1	3	1	False
912	1	1	5	1	4	4	2	4	4	5	7	True
913	2	1	1	1	4	2	4	2	2	2	10	True
914	1	5	2	2	1	3	1	1	2	4	9	True
915	1	2	4	4	2	3	4	4	3	2	1	False
916	1	2	5	2	2	4	1	1	2	3	10	True
917	1	5	3	2	1	1	5	5	2	5	4	False
918	1	2	3	1	2	5	4	3	5	5	3	False
919	1	5	5	4	1	2	2	2	3	1	8	True
920	2	1	2	4	3	2	4	2	4	2	8	True
921	3	4	2	5	3	2	1	3	2	3	8	True
922	2	3	3	1	4	4	2	1	1	1	10	True
923	2	5	2	5	2	3	3	1	3	4	7	True
924	2	1	5	1	5	5	3	1	4	1	8	True
925	1	3	1	5	5	4	2	3	3	3	5	False
926	2	2	3	2	2	2	1	4	1	4	9	True
927	3	4	2	3	4	3	3	2	4	5	10	True
928	1	1	5	1	1	5	3	2	2	1	3	False
929	2	4	3	1	1	2	1	3	1	3	2	False
930	3	3	3	1	1	3	5	2	4	4	7	True
931	3	2	4	1	2	1	4	3	5	5	6	True
932	1	3	2	2	2	1	3	3	1	4	2	False
933	3	5	3	1	3	5	4	4	5	2	4	False
934	1	4	4	4	2	2	4	3	1	1	10	True
935	3	3	1	1	3	2	1	1	1	3	3	False
936	1	2	4	5	2	1	1	4	5	5	6	True
937	1	2	3	4	5	1	2	1	3	3	5	False
938	3	2	3	1	1	4	2	2	5	2	5	False
939	3	3	1	2	4	2	2	4	1	4	8	True
940	1	5	3	4	4	5	2	1	3	2	5	False
941	2	3	5	5	1	1	3	1	5	2	5	False
942	3	5	4	4	5	5	3	2	5	2	5	False
943	3	3	5	2	1	5	5	2	2	5	5	False
944	1	1	5	2	3	3	4	4	5	4	7	True
945	2	1	3	4	3	1	4	4	3	5	2	False
946	2	1	4	4	3	2	3	1	2	3	10	True
947	2	4	1	1	2	4	2	4	3	3	3	False
948	3	2	3	1	4	1	2	4	1	3	10	True
949	2	2	4	5	4	2	4	1	1	2	3	False
950	1	5	2	2	1	4	5	1	5	5	8	True
951	1	3	2	3	3	5	1	4	3	1	8	True
952	3	1	4	5	3	3	1	5	2	4	1	False
953	2	3	3	3	2	2	3	3	5	1	5	False
954	2	2	2	1	2	1	1	1	3	4	2	False
955	2	3	2	2	5	5	1	4	3	5	6	True
956	2	3	3	3	5	4	5	4	1	4	4	False
957	1	1	3	1	3	1	4	4	1	1	1	False
958	1	3	3	3	3	3	3	4	3	2	4	False
959	2	3	3	2	4	2	2	2	1	5	9	True
960	3	4	4	3	2	5	4	3	2	2	3	False
961	1	5	1	5	5	2	1	5	5	1	2	False
962	3	2	5	1	4	1	1	3	4	2	1	False
963	3	3	1	3	4	5	3	3	3	1	7	True
964	1	4	1	2	3	2	4	3	3	1	8	True
965	1	5	1	4	3	5	4	1	4	3	4	False
966	2	3	3	1	3	4	2	2	3	5	9	True
967	1	3	2	5	2	2	3	2	3	4	6	True
968	1	3	1	4	2	5	2	1	2	3	10	True
969	2	3	2	2	1	4	2	5	3	2	2	False
970	1	2	3	2	1	4	1	5	4	3	5	False
971	3	2	1	1	1	3	3	4	5	2	8	True
972	2	2	1	4	1	5	1	4	2	3	1	False
973	3	5	1	2	3	3	4	1	3	5	4	False
974	2	4	5	2	2	4	1	3	5	2	2	False
975	1	3	4	4	3	3	5	2	2	1	3	False
976	1	2	4	5	5	3	5	4	5	4	2	False
977	3	2	5	4	4	2	4	5	4	4	1	False
978	3	5	4	2	3	4	3	2	3	3	10	True
979	3	2	2	2	4	2	2	2	3	5	4	False
980	3	2	2	2	4	5	1	2	3	4	7	True
981	2	3	4	2	2	1	2	5	1	3	9	True
982	3	5	5	4	4	3	5	1	3	4	10	True
983	3	3	5	2	2	4	4	1	5	1	5	False
984	3	2	1	5	3	2	5	3	1	4	3	False
985	3	3	1	4	5	1	5	2	1	3	10	True
986	3	3	3	5	1	4	2	5	1	5	4	False
987	3	5	5	5	4	1	4	4	2	2	8	True
988	2	2	3	1	4	2	1	1	5	2	7	True
989	3	3	1	5	5	2	4	4	2	5	6	True
990	2	2	3	5	5	3	1	5	5	1	4	False
991	2	2	5	1	3	2	2	3	1	1	3	False
992	1	4	3	4	1	3	1	3	5	4	2	False
993	1	4	5	5	4	5	5	1	4	2	10	True
994	3	1	4	3	4	5	2	2	4	5	10	True
995	2	2	3	3	5	1	3	3	4	5	4	False
996	1	5	3	4	3	1	3	2	4	2	4	False
997	2	5	3	3	2	5	4	3	3	1	4	False
998	2	3	3	2	1	3	1	1	3	2	7	True
999	1	4	4	4	2	3	3	1	4	1	5	False
1000	1	4	3	4	2	2	1	2	3	1	6	True
1001	1	3	2	2	5	2	5	3	3	1	1	False
1002	2	4	2	5	1	4	3	1	4	1	8	True
1003	2	3	5	5	3	3	4	4	2	4	1	False
1004	1	2	5	2	5	1	5	2	2	3	2	False
1005	2	3	5	1	4	5	4	3	3	4	9	True
1006	1	4	1	1	4	2	3	3	1	2	6	True
1007	2	5	3	2	4	5	5	2	2	4	4	False
1008	1	1	5	3	3	3	3	2	2	2	3	False
1009	2	3	1	5	1	5	4	4	5	3	8	True
1010	2	3	3	5	4	2	5	3	3	2	3	False
1011	1	4	2	1	5	3	3	1	3	4	1	False
1012	2	1	3	3	3	3	4	2	3	4	3	False
1013	1	5	3	2	1	1	3	5	2	1	4	False
1014	2	3	3	2	3	5	5	4	2	1	10	True
1015	1	2	3	4	2	4	2	1	2	2	6	True
1016	3	3	4	5	1	1	1	1	2	4	8	True
1017	3	4	4	5	4	1	1	1	5	5	10	True
1018	2	5	3	5	2	5	1	3	4	4	3	False
1019	1	1	4	4	2	4	5	5	1	3	7	True
1020	2	3	5	2	3	1	4	4	2	3	7	True
1021	3	1	1	5	2	2	4	1	1	3	1	False
1022	3	5	4	3	5	1	1	3	3	1	7	True
1023	3	3	2	5	1	2	2	4	3	5	5	False
1024	1	4	1	1	5	4	1	5	5	2	8	True
1025	2	3	3	4	3	2	5	2	5	5	8	True
1026	2	5	4	3	2	1	3	1	4	1	6	True
1027	1	1	3	5	3	2	5	5	3	2	3	False
1028	3	4	1	5	1	5	2	3	4	1	3	False
1029	3	2	5	2	5	3	1	5	1	1	3	False
1030	2	4	4	2	5	4	5	1	1	5	1	False
1031	1	3	1	4	1	4	5	2	3	3	9	True
1032	2	4	5	1	2	3	1	1	4	1	1	False
1033	3	5	3	4	3	5	4	1	1	2	1	False
1034	1	4	5	5	2	5	2	2	4	2	6	True
1035	3	3	3	1	4	1	4	1	5	2	9	True
1036	3	1	4	4	1	5	4	1	5	3	3	False
1037	3	1	1	1	5	5	5	2	4	5	5	False
1038	3	1	3	5	2	4	5	1	3	2	6	True
1039	1	3	5	2	4	1	5	1	1	1	8	True
1040	3	1	5	1	2	4	1	3	5	1	6	True
1041	1	4	1	5	1	1	3	1	4	4	2	False
1042	3	1	1	3	3	1	3	1	4	5	1	False
1043	1	5	1	3	1	3	5	3	3	5	9	True
1044	1	2	3	1	3	2	4	3	5	1	10	True
1045	2	2	3	4	1	2	2	1	2	5	8	True
1046	3	3	5	2	1	3	2	2	3	3	9	True
1047	2	4	4	3	2	3	1	3	1	5	6	True
1048	3	4	3	2	4	4	3	4	5	1	9	True
1049	2	1	2	2	1	5	1	1	1	1	10	True
1050	2	3	5	4	1	3	5	5	3	4	6	True
1051	1	1	2	4	1	5	2	4	4	4	4	False
1052	1	4	4	1	3	5	3	1	5	4	4	False
1053	3	3	2	4	5	2	1	2	4	5	3	False
1054	3	3	5	4	5	5	4	3	1	1	10	True
1055	2	4	4	2	4	4	1	1	2	3	1	False
1056	1	2	3	4	4	3	5	4	2	4	5	False
1057	3	5	3	2	5	3	3	3	5	5	9	True
1058	2	1	5	4	2	5	3	3	2	3	6	True
1059	1	4	4	5	4	5	4	1	2	2	2	False
1060	3	3	5	5	1	3	2	1	5	2	9	True
1061	2	2	1	1	2	2	2	3	2	2	5	False
1062	3	2	3	4	4	1	2	4	4	4	10	True
1063	2	4	1	4	2	3	1	3	2	1	5	False
1064	3	2	5	4	4	2	3	2	3	5	10	True
1065	1	4	2	3	3	4	3	1	1	2	5	False
1066	3	1	2	4	2	5	2	3	5	4	4	False
1067	3	3	3	5	3	3	5	5	1	5	6	True
1068	2	2	2	1	2	4	4	4	2	1	2	False
1069	3	4	1	4	1	2	1	2	2	1	5	False
1070	2	5	1	3	3	1	4	4	2	2	3	False
1071	3	4	1	3	4	1	1	1	3	4	8	True
1072	2	5	1	2	2	1	1	1	3	4	5	False
1073	2	2	1	5	3	1	1	4	2	4	10	True
1074	3	1	4	3	4	4	4	1	3	5	3	False
1075	1	5	3	4	5	3	3	5	1	1	9	True
1076	2	3	4	4	4	5	2	5	4	4	5	False
1077	3	1	2	4	4	3	2	5	4	3	1	False
1078	3	5	3	5	5	5	4	4	4	3	10	True
1079	2	5	5	3	3	4	2	2	3	5	4	False
1080	1	4	5	5	2	2	5	2	4	4	2	False
1081	2	2	3	1	1	1	4	5	1	1	9	True
1082	2	1	5	2	1	3	4	2	5	3	7	True
1083	3	3	4	3	3	3	4	1	5	3	9	True
1084	2	1	2	3	3	2	3	3	1	1	1	False
1085	2	5	5	5	5	2	2	3	5	1	9	True
1086	3	1	4	5	5	2	4	1	5	1	1	False
